# Supplementary material for: Modelling Bluetongue and African horse sickness vector (Culicoides spp.) distribution in the Western Cape in South Africa using Random Forest machine learning
Source: Research Square preprint supplement (doi:10.21203/rs.3.rs-4542200/v1), 2024-06-21
Supplement: Supplementary file 1 [file 99f5637cb8bbaa313d4f9c5d.docx]

# Supplementary Material

SM1: Complete list of predictors analysed before inclusion in the model

Table SM1: Sources of prediction and projection variables. * Removed due to high correlation with another variable

| **Source** | **Abbreviation** | **Prediction layer** | **Projection layer** |
| --- | --- | --- | --- |
| South African Weather Service | Tmin | Minimum daily temperature (Celsius) | WorldClim monthly 20 year average Tmin |
|  | Tmax | Maximum daily temperature (Celsius) | WorldClim monthly 20 year average Tmax |
|  | Tmin_4w | Minimum daily temperature (4 weeks prior) (Celsius) | WorldClim monthly 20 year average Tmin (month prior) |
|  | Tmax_4w | Maximum daily temperature (4 weeks prior) (Celsius) | WorldClim monthly 20 year average Tmax (month prior) |
|  | WND | Average daily wind (m/s) | WorldClim monthly 20 year average wind |
|  | WND_4w | Average daily wind (4 weeks prior) (m/s) | WorldClim monthly 20 year average wind (month prior) |
|  | PRCP | Average monthly precipitation (mm) | WorldClim monthly 20 year average precipitation |
|  | PRCP_1m | Average monthly precipitation (1 month prior) (mm) | WorldClim monthly 20 year average precipitation (month prior) |
| MODIS | NDVI* | NDVI (closest date 15 days) | NA – removed |
|  | NDVI_1m* | NDVI (closest date 1 month prior) | NA – removed |
|  | EVI* | EVI (closest date 15 days) | NA – removed |
|  | EVI_1m* | EVI (closest date 1 month prior) | NA – removed |
| Copernicus CDS | SM | Soil moisture monthly average (% saturated) | Copernicus monthly soil moisture 20-year aggregated mean |
|  | SM_1m* | Soil moisture previous monthly average (% saturated) | NA – removed |
|  | SM_annual | Volume of water in the top 7cm of soil. Annually averaged. | Copernicus annual soil moisture 20-year aggregated mean |
|  | SM_dry* | Volume of water in the top 7cm of soil. Average of the driest quarter. | NA – removed |
|  | SM_wet* | Volume of water in the top 7cm of soil. Average of the wettest quarter. | NA – removed |
|  | SM_warm* | Volume of water in the top 7cm of soil. Average of the warmest quarter. | NA – removed |
|  | SM_cold* | Volume of water in the top 7cm of soil. Average of the coldest quarter. | NA – removed |
|  | AR_annual* | Monthly evaporation divided by monthly mean precipitation (m s-1). Annual average. | NA – removed |
|  | AR_dry | Monthly evaporation divided by monthly mean precipitation (m s-1). Average of the driest quarter. | Copernicus aridity in the driest quarter 20-year aggregated mean |
|  | AR_wet* | Monthly evaporation divided by monthly mean precipitation (m s-1). Average of the wettest quarter. | NA – removed |
|  | AR_warm* | Monthly evaporation divided by monthly mean precipitation (m s-1). Average of the warmest quarter. | NA – removed |
|  | AR_cold* | Monthly evaporation divided by monthly mean precipitation (m s-1). Average of the coldest quarter. | NA – removed |
|  | FST_month* | Number of days per month with temperature below 0 oC | Copernicus monthly frost days 20-year aggregated mean |
|  | FST | Number of days per year with temperature below 0 oC | Copernicus annual frost days sum 20-year aggregated mean |
|  | WV | Daily water vapour pressure, aggregated monthly | Copernicus monthly water vapour 20-year aggregated mean |
|  | DRY* | Number of days per year with <2mm rainfall | NA – removed |
|  | BIO1* | Yearly mean of the monthly mean temperature. | Copernicus BIO1 20-year aggregated mean |
|  | BIO2* | Monthly average of the maximum minus the minimum temperature | NA – removed |
|  | BIO3* | Monthly diurnal range divided by annual range * 100 | NA – removed |
|  | BIO4* | Standard deviation of the monthly average temperature * 100 | NA – removed |
|  | BIO5* | Monthly average of maximum temperature in month with the highest temperature | NA – removed |
|  | BIO6* | Monthly average of minimum temperature in the month with the lowest temperature | Copernicus BIO6 20-year aggregated mean |
|  | BIO7* | BIO5 minus BIO6 | NA – removed |
|  | BIO8 | Mean temperature of the wettest quarter | Copernicus BIO8 20-year aggregated mean |
|  | BIO9* | Mean temperature of the driest quarter | NA – removed |
|  | BIO10* | Mean temperature of the warmest quarter | NA – removed |
|  | BIO11* | Mean temperature of the coldest quarter | NA – removed |
|  | BIO12* | Annual mean precipitation | NA – removed |
|  | BIO13* | Maximum monthly precipitation. | NA – removed |
|  | BIO14* | Minimum monthly precipitation | NA – removed |
|  | BIO15* | Annual coefficient of variation of the monthly precipitation | NA – removed |
|  | BIO16* | Mean precipitation of the wettest quarter | NA – removed |
|  | BIO17* | Mean precipitation of the driest quarter | NA – removed |
|  | BIO18* | Mean precipitation of the warmest quarter | NA – removed |
|  | BIO19* | Mean precipitation of the coldest quarter | NA – removed |
| WCDoA | CTL | Cattle distribution (2020-2023 average) | Same as prediction layer |
|  | SHP | Sheep distribution (2020-2023 average) | Same as prediction layer |
|  | ENPAT* | Soil type (by description) | Same as prediction layer |
| SAEHP | HRS* | Horse distribution (2002 census) | NA – removed |
| DFFE | NLC* | National land cover (simplified categories) | NA – removed |
| WorldClim | DEM | Digital elevation model | Same as prediction layer |

## SM2: Q-Q plots


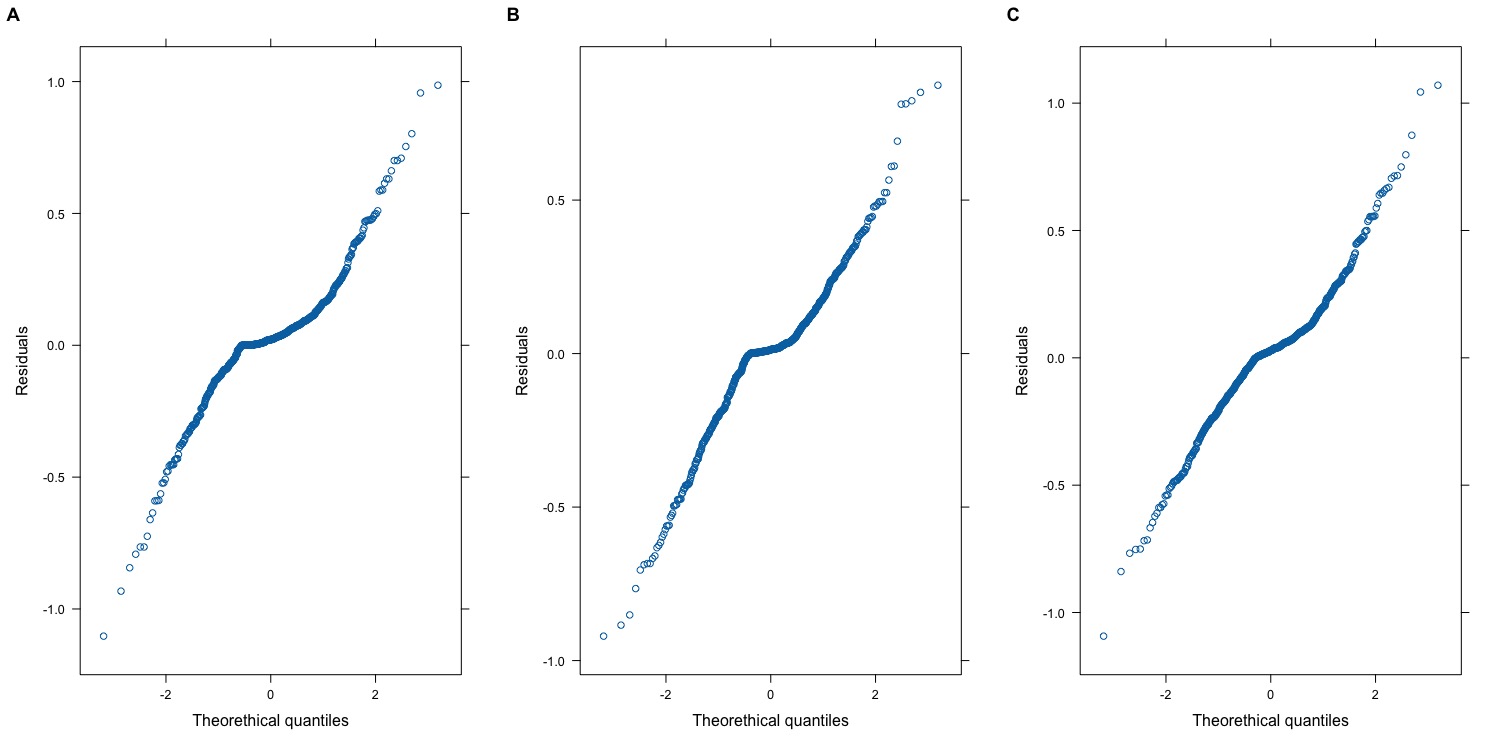


Figure SM2 Q-Q plots analysing the distribution of the residuals of each model. A = C. imicola, B = C. bolitinos, C = Grouped competent AHS/BT vector

## SM3: Interpolation maps


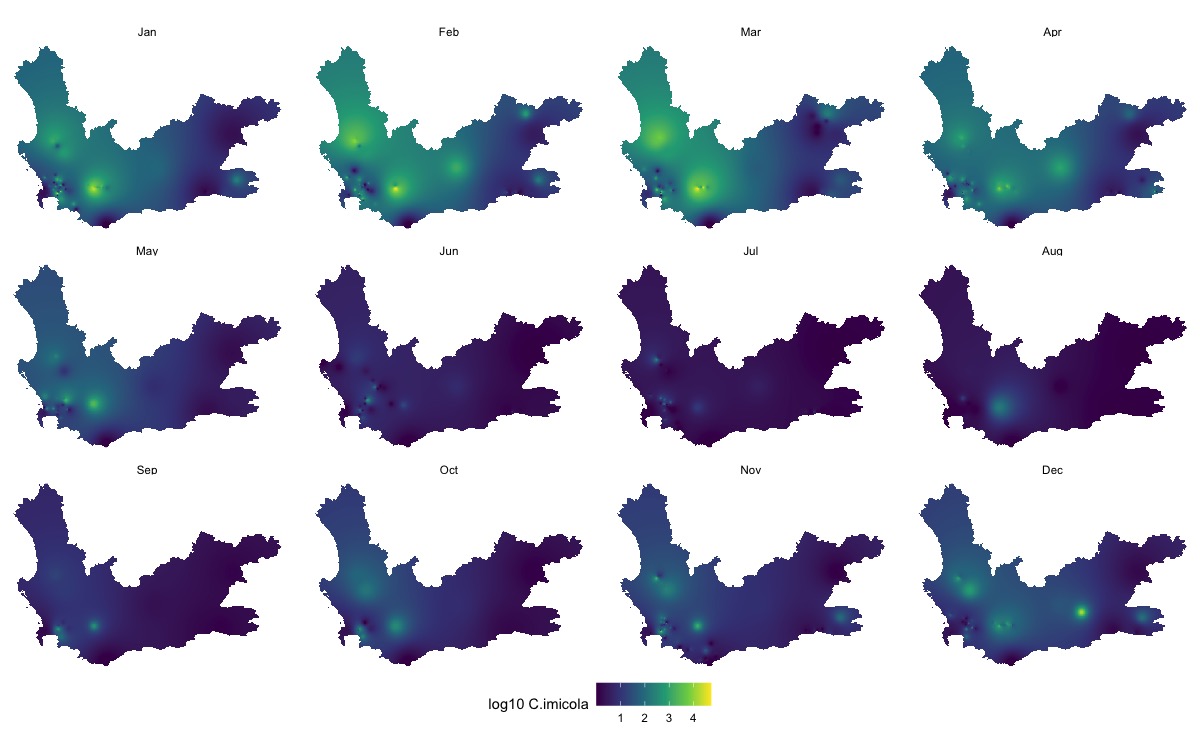


Figure SM3a C. imicola interpolation map


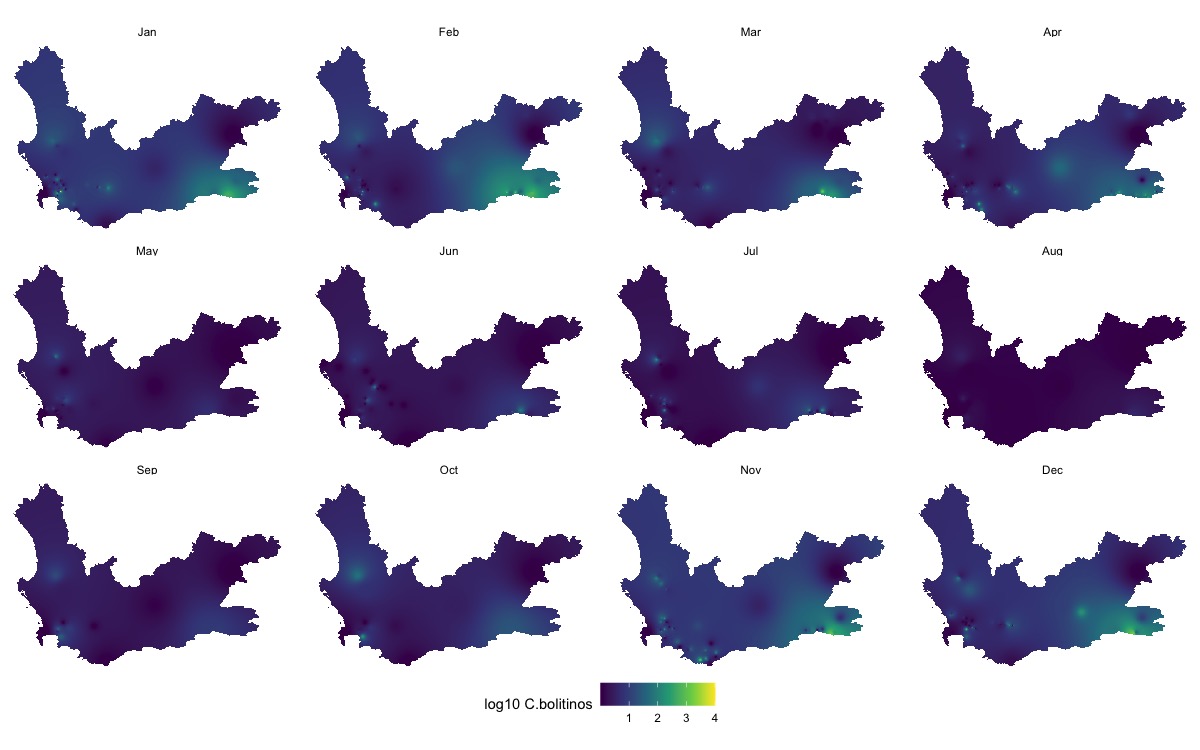


Figure SM3b C. bolitinos interpolation map


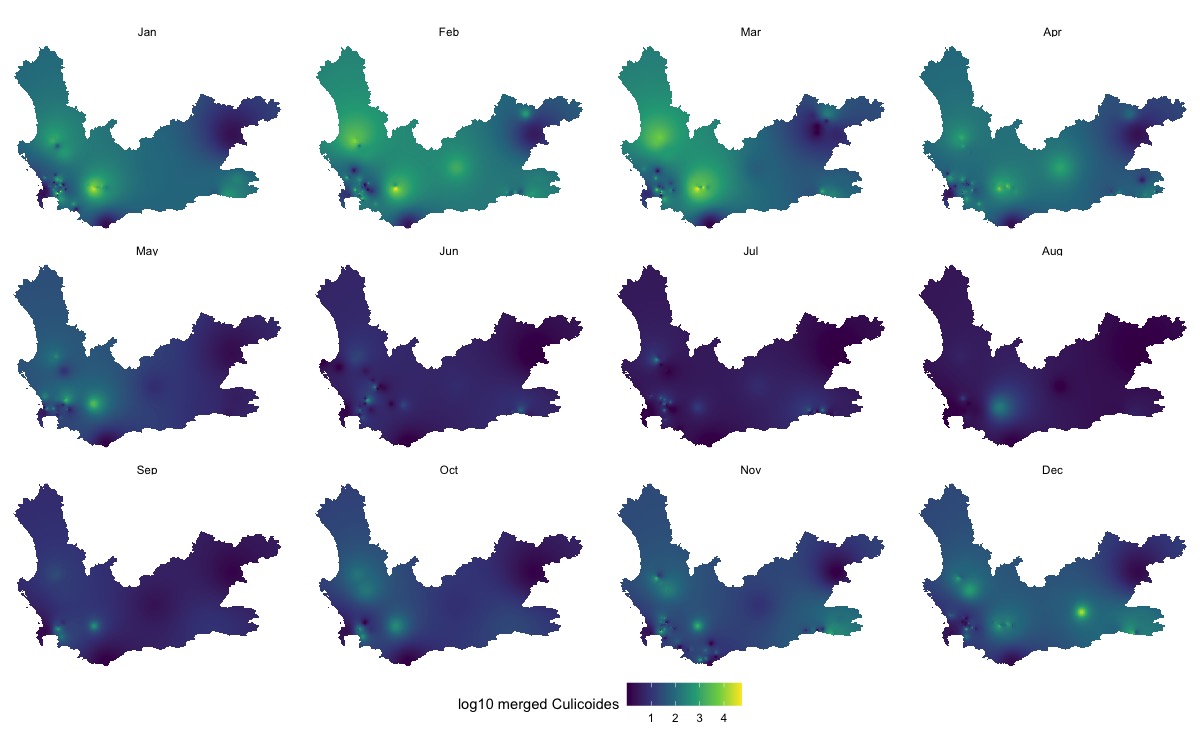


Figure SM3c Grouped competent vectors interpolation map
